# Supplementary material
Source: PubMed Central journal article supplement (PMC8648965)
Supplement: NIHMS1732043-supplement-supinfo.pdf [file NIHMS1732043-supplement-supinfo.pdf]

# **Supplemental File for Online Publication**

Self-Efficacy Proxy Predicts Frailty Incidence Over Time  
in Non-Institutionalized Older Adults

Supplemental Table S1. Comparison of Demographic and Health Characteristics for Included and Excluded Sample

Supplemental Table S2. Frailty Incidence for Low vs High Self-Efficacy with Prefrail as Covariate

Supplemental Table S3. Frailty Incidence for Low vs High Self-Efficacy with No Baseline Depressive Symptoms Sample

Supplemental Table S4. Frailty Incidence for Three Categories of Self-Efficacy

**Supplemental Table S1.** Comparison of Demographic and Health Characteristics for Included and Excluded Sample

| Variable                      | Study Sample<br>N=4825        | Excluded Sample<br>N=1006 | P-Value     |       |
|-------------------------------|-------------------------------|---------------------------|-------------|-------|
| <b>Baseline Age</b>           |                               |                           | 0.862       |       |
|                               | 65-69                         | 1011 (31%)                | 211 (29%)   |       |
|                               | 70-74                         | 1100 (26%)                | 248 (27%)   |       |
|                               | 75-79                         | 1016 (19%)                | 208 (20%)   |       |
|                               | 80-84                         | 926 (14%)                 | 183 (14%)   |       |
|                               | 85-89                         | 479 (7%)                  | 101 (7%)    |       |
|                               | 90+                           | 293 (3%)                  | 55 (3%)     |       |
| <b>Race/Ethnicity</b>         |                               |                           | 0.005       |       |
|                               | White, non-Hispanic           | 3512 (84%)                | 691 (80%)   |       |
|                               | Black, non-Hispanic           | 960 (7%)                  | 215 (8%)    |       |
|                               | Hispanic                      | 236 (6%)                  | 65 (8%)     |       |
|                               | Other                         | 117 (3%)                  | 35 (4%)     |       |
| <b>Education</b>              |                               |                           | <0.001      |       |
|                               | <8th grade                    | 446 (7%)                  | 114 (10%)   |       |
|                               | 9-12th No diploma             | 614 (10%)                 | 139 (12%)   |       |
|                               | High school diploma           | 1319 (27%)                | 302 (30%)   |       |
|                               | > High school                 | 2444 (56%)                | 449 (48%)   |       |
| <b>Sex</b>                    |                               |                           | 0.386       |       |
|                               | Male                          | 2085 (45%)                | 434 (43%)   |       |
|                               | Female                        | 2740 (55%)                | 572 (57%)   |       |
| <b>Baseline Income</b>        |                               |                           | <0.001      |       |
|                               | <15k                          | 1180 (20%)                | 266 (22%)   |       |
|                               | 15k-30k                       | 1175 (22%)                | 268 (26%)   |       |
|                               | 30k-60k                       | 1292 (28%)                | 288 (31%)   |       |
|                               | >60k                          | 1178 (30%)                | 184 (22%)   |       |
| <b>Baseline Disability</b>    |                               |                           | 0.480       |       |
|                               | Fully able                    | 2082 (47%)                | 474 (49%)   |       |
|                               | Accommodate/reduced frequency | 2186 (43%)                | 412 (40%)   |       |
|                               | Difficulty                    | 198 (4%)                  | 38 (4%)     |       |
|                               | Need assistance               | 359 (6%)                  | 82 (7%)     |       |
| <b>Disease Count</b>          | Mean (SD)                     | 2.18 (1.40)               | 2.17 (1.40) | 0.740 |
| <b>Baseline Self-Efficacy</b> |                               |                           | 0.073       |       |
|                               | High                          | 4417 (92%)                | 901 (90%)   |       |
|                               | Low                           | 408 (8%)                  | 105 (10%)   |       |

Notes: 1. N=4825 is number of complete non-frail cases with self-efficacy information at baseline. 2. N=1006 is number of excluded cases because of no following up info of frailty. 3. Chi-squared test for categorical variables and t-test for continuous variables are examined by self-efficacy. 4. Percentages, means, and SDs are weighted measures. SD: Standard Deviation

**Supplemental Table S2. Frailty Incidence for Low vs High Self-Efficacy with Prefrail as Covariate**

| Variable                     |                               | Model 1            |          | Model 2            |          |
|------------------------------|-------------------------------|--------------------|----------|--------------------|----------|
|                              |                               | Hazard Ratios (CI) | P values | Hazard Ratios (CI) | P values |
| <b>Time intervals</b>        |                               |                    |          |                    |          |
|                              | 1                             | ref                | ref      | ref                | ref      |
|                              | 2                             | 0.89 (0.74-1.07)   | 0.218    | 0.91 (0.75-1.10)   | 0.319    |
|                              | 3                             | 0.91 (0.74-1.13)   | 0.384    | 0.94 (0.76-1.17)   | 0.569    |
|                              | 4                             | 1.04 (0.86-1.26)   | 0.695    | 1.09 (0.90-1.32)   | 0.358    |
|                              | 5                             | 0.74 (0.58-0.95)   | 0.021    | 0.80 (0.62-1.03)   | 0.085    |
|                              | 6                             | 0.93 (0.76-1.15)   | 0.503    | 1.01 (0.82-1.26)   | 0.891    |
|                              | 7                             | 0.94 (0.72-1.23)   | 0.657    | 1.04 (0.79-1.37)   | 0.794    |
| <b>Self-Efficacy</b>         | Low                           | 1.26 (1.02-1.57)   | 0.031    | 1.18 (0.94-1.48)   | 0.151    |
| <b>Pre-frail at Baseline</b> | Yes                           | 3.25 (2.79-3.78)   | <0.001   | 2.66 (2.29-3.09)   | <0.001   |
| <b>Baseline Age</b>          | 65-69                         | ref                | ref      | ref                | ref      |
|                              | 70-74                         | 1.54 (1.24-1.90)   | <0.001   | 1.46 (1.17-1.81)   | 0.001    |
|                              | 75-79                         | 2.08 (1.71-2.54)   | <0.001   | 1.90 (1.57-2.31)   | <0.001   |
|                              | 80-84                         | 2.62 (2.14-3.22)   | <0.001   | 2.38 (1.92-2.95)   | <0.001   |
|                              | 85-89                         | 3.54 (2.84-4.41)   | <0.001   | 3.13 (2.47-3.96)   | <0.001   |
|                              | 90+                           | 4.45 (3.50-5.67)   | <0.001   | 3.73 (2.94-4.73)   | <0.001   |
| <b>Race</b>                  | White, non-Hispanic           | ref                | ref      | ref                | ref      |
|                              | Black, non-Hispanic           | 1.23 (1.06-1.43)   | 0.008    | 1.25 (1.06-1.46)   | 0.007    |
|                              | Hispanic                      | 1.10 (0.86-1.39)   | 0.449    | 1.21 (0.95-1.53)   | 0.119    |
|                              | Other                         | 1.11 (0.71-1.73)   | 0.656    | 1.16 (0.75-1.82)   | 0.496    |
| <b>Education</b>             | <8th grade                    | ref                | ref      | ref                | ref      |
|                              | 9-12th No diploma             | 0.83 (0.64-1.08)   | 0.164    | 0.84 (0.64-1.10)   | 0.203    |
|                              | High school diploma           | 0.71 (0.59-0.87)   | 0.001    | 0.78 (0.64-0.95)   | 0.015    |
|                              | > High school                 | 0.63 (0.53-0.76)   | <0.001   | 0.67 (0.54-0.82)   | <0.001   |
| <b>Sex</b>                   | Male                          | ref                | ref      | ref                | ref      |
|                              | Female                        | 1.02 (0.90-1.15)   | 0.804    | 0.90 (0.79-1.02)   | 0.094    |
| <b>Baseline Income</b>       | <15k                          | ref                | ref      | ref                | ref      |
|                              | 15k-30k                       | 0.93 (0.79-1.10)   | 0.415    | 0.92 (0.77-1.10)   | 0.350    |
|                              | 30k-60k                       | 0.76 (0.63-0.93)   | 0.009    | 0.79 (0.64-0.97)   | 0.024    |
|                              | >60k                          | 0.66 (0.54-0.80)   | <0.001   | 0.68 (0.56-0.83)   | <0.001   |
| <b>Baseline Disability</b>   | Fully able                    |                    |          | ref                | ref      |
|                              | Accommodate/reduced frequency |                    |          | 1.31 (1.14-1.50)   | <0.001   |
|                              | Difficulty                    |                    |          | 1.86 (1.42-2.43)   | <0.001   |
|                              | Need assistance               |                    |          | 2.31 (1.84-2.89)   | <0.001   |
| <b>Disease Count</b>         |                               |                    |          | 1.23 (1.19-1.28)   | <0.001   |

Notes: CI: Confidence Intervals. Numbers reported are calculated based on weighted counts.

**Supplemental Table S3.** Frailty Incidence for Low vs High Self-Efficacy with No Baseline Depressive Symptoms Sample

| Variable                   |                               | Model 1 (Primary)*<br>N=4294 |          | Model 2*<br>N=4294 |          |
|----------------------------|-------------------------------|------------------------------|----------|--------------------|----------|
|                            |                               | Hazard Ratios                | P values | Hazard Ratios      | P values |
| <b>Time intervals</b>      | 1                             | ref                          | ref      | ref                | ref      |
|                            | 2                             | 0.88 (0.70-1.11)             | 0.279    | 0.91 (0.73-1.14)   | 0.415    |
|                            | 3                             | 0.90 (0.73-1.11)             | 0.319    | 0.94 (0.76-1.17)   | 0.595    |
|                            | 4                             | 0.98 (0.79-1.21)             | 0.829    | 1.05 (0.85-1.29)   | 0.653    |
|                            | 5                             | 0.66 (0.49-0.87)             | 0.004    | 0.72 (0.54-0.95)   | 0.021    |
|                            | 6                             | 0.90 (0.71-1.15)             | 0.398    | 1.00 (0.78-1.28)   | 0.979    |
|                            | 7                             | 0.89 (0.66-1.20)             | 0.437    | 1.00 (0.74-1.36)   | 0.976    |
| <b>Self-Efficacy</b>       | Low                           | 1.32 (1.03-1.69)             | 0.028    | 1.21 (0.94-1.56)   | 0.141    |
| <b>Demographics</b>        |                               |                              |          |                    |          |
| <b>Baseline Age</b>        | 65-69                         | ref                          | ref      | ref                | ref      |
|                            | 70-74                         | 1.63 (1.29-2.06)             | <0.001   | 1.50 (1.16-1.94)   | 0.003    |
|                            | 75-79                         | 2.31 (1.87-2.86)             | <0.001   | 2.02 (1.63-2.51)   | <0.001   |
|                            | 80-84                         | 3.19 (2.53-4.03)             | <0.001   | 2.73 (2.12-3.50)   | <0.001   |
|                            | 85-89                         | 4.19 (3.33-5.27)             | <0.001   | 3.39 (2.61-4.40)   | <0.001   |
|                            | 90+                           | 5.79 (4.41-7.60)             | <0.001   | 4.42 (3.38-5.77)   | <0.001   |
| <b>Race</b>                | White, non-Hispanic           | ref                          | ref      | ref                | ref      |
|                            | Black, non-Hispanic           | 1.33 (1.12-1.57)             | 0.001    | 1.31 (1.11-1.54)   | 0.002    |
|                            | Hispanic                      | 1.03 (0.78-1.38)             | 0.815    | 1.16 (0.89-1.51)   | 0.272    |
|                            | Other                         | 1.10 (0.66-1.85)             | 0.699    | 1.19 (0.71-1.99)   | 0.506    |
| <b>Education</b>           | < 8th grade                   | ref                          | ref      | ref                | ref      |
|                            | 9-12th No diploma             | 0.86 (0.64-1.15)             | 0.292    | 0.88 (0.65-1.19)   | 0.406    |
|                            | High school diploma           | 0.75 (0.61-0.94)             | 0.011    | 0.82 (0.65-1.03)   | 0.089    |
|                            | > High school                 | 0.63 (0.51-0.77)             | <0.001   | 0.66 (0.52-0.85)   | 0.001    |
| <b>Sex</b>                 | Male                          | ref                          | ref      | ref                | ref      |
|                            | Female                        | 1.01 (0.88-1.17)             | 0.833    | 0.87 (0.75-1.00)   | 0.049    |
| <b>Baseline Income</b>     | <15k                          | ref                          | ref      | ref                | ref      |
|                            | 15k-30k                       | 0.88 (0.74-1.05)             | 0.157    | 0.88 (0.73-1.06)   | 0.179    |
|                            | 30k-60k                       | 0.67 (0.55-0.81)             | <0.001   | 0.70 (0.56-0.86)   | 0.001    |
|                            | >60k                          | 0.56 (0.45-0.70)             | <0.001   | 0.61 (0.48-0.77)   | <0.001   |
| <b>Baseline Disability</b> | Fully able                    |                              |          | ref                | ref      |
|                            | Accommodate/reduced frequency |                              |          | 1.42 (1.23-1.64)   | <0.001   |
|                            | Difficulty                    |                              |          | 2.40 (1.77-3.25)   | <0.001   |
|                            | Need assistance               |                              |          | 2.80 (2.22-3.54)   | <0.001   |
| <b>Disease</b>             |                               |                              |          | 1.29 (1.24-1.35)   | <0.001   |

\*Weighted Counts

Notes: Model 1 is adjusted for age, race/ethnicity, sex, education and income. Model 2 is further adjusted for chronic disease count and disability.

**Supplemental Table S4. Frailty Incidence for Three Categories of Self-Efficacy**

| Variable                   |                               | Model 1            |                  | Model 2            |          |
|----------------------------|-------------------------------|--------------------|------------------|--------------------|----------|
|                            |                               | Hazard Ratios (CI) | P values         | Hazard Ratios (CI) | P values |
| <b>Time intervals</b>      | 1                             | ref                | ref              | ref                | ref      |
|                            | 2                             | 0.86 (0.71-1.03)   | 0.103            | 0.89 (0.74-1.07)   | 0.207    |
|                            | 3                             | 0.86 (0.69-1.06)   | 0.148            | 0.90 (0.72-1.12)   | 0.335    |
|                            | 4                             | 0.95 (0.79-1.16)   | 0.634            | 1.03 (0.85-1.25)   | 0.757    |
|                            | 5                             | 0.67 (0.52-0.86)   | 0.002            | 0.74 (0.58-0.96)   | 0.024    |
|                            | 6                             | 0.83 (0.68-1.02)   | 0.081            | 0.94 (0.76-1.16)   | 0.547    |
|                            | 7                             | 0.83 (0.63-1.08)   | 0.161            | 0.95 (0.72-1.25)   | 0.703    |
| <b>Self-Efficacy</b>       | Agree A Lot                   | ref                | ref              | ref                | ref      |
|                            | Agree A Little                | 1.38 (1.10-1.73)   | 0.006            | 1.25 (0.99-1.57)   | 0.059    |
|                            | Agree Not At All              | 1.75 (0.96-3.19)   | 0.065            | 1.56 (0.80-3.02)   | 0.187    |
| <b>Baseline Age</b>        | 65-69                         | ref                | ref              | ref                | ref      |
|                            | 70-74                         | 1.65 (1.35-2.01)   | <0.001           | 1.52 (1.23-1.88)   | <0.001   |
|                            | 75-79                         | 2.21 (1.83-2.66)   | <0.001           | 1.93 (1.60-2.33)   | <0.001   |
|                            | 80-84                         | 2.94 (2.42-3.58)   | <0.001           | 2.50 (2.03-3.09)   | <0.001   |
|                            | 85-89                         | 4.07 (3.30-5.04)   | <0.001           | 3.32 (2.64-4.17)   | <0.001   |
|                            | 90+                           | 5.28 (4.14-6.74)   | <0.001           | 4.03 (3.18-5.10)   | <0.001   |
| <b>Race</b>                | White, non-Hispanic           | ref                | ref              | ref                | ref      |
|                            | Black, non-Hispanic           | 1.28 (1.10-1.49)   | 0.002            | 1.27 (1.09-1.49)   | 0.003    |
|                            | Hispanic                      | 1.11 (0.87-1.41)   | 0.388            | 1.21 (0.95-1.54)   | 0.122    |
|                            | Other                         | 1.06 (0.65-1.73)   | 0.796            | 1.13 (0.71-1.80)   | 0.605    |
| <b>Education</b>           | < 8th grade                   | ref                | ref              | ref                | ref      |
|                            | 9-12th No diploma             | 0.84 (0.65-1.09)   | 0.190            | 0.85 (0.66-1.11)   | 0.233    |
|                            | High school diploma           | 0.69 (0.57-0.83)   | <0.001           | 0.77 (0.63-0.93)   | 0.008    |
|                            | > High school                 | 0.60 (0.50-0.72)   | <0.001           | 0.64 (0.52-0.78)   | <0.001   |
| <b>Sex</b>                 | Male                          | ref                | ref              | ref                | ref      |
|                            | Female                        | 1.05 (0.92-1.19)   | 0.465            | 0.90 (0.78-1.03)   | 0.113    |
| <b>Baseline Income</b>     | <15k                          | ref                | ref              | ref                | ref      |
|                            | 15k-30k                       | 0.89 (0.76-1.04)   | 0.142            | 0.87 (0.73-1.03)   | 0.108    |
|                            | 30k-60k                       | 0.70 (0.58-0.84)   | <0.001           | 0.73 (0.59-0.89)   | 0.003    |
|                            | >60k                          | 0.56 (0.46-0.69)   | <0.001           | 0.61 (0.50-0.76)   | <0.001   |
| <b>Baseline Disability</b> | Fully able                    |                    |                  | ref                | ref      |
|                            | Accommodate/reduced frequency |                    |                  | 1.40 (1.22-1.60)   | <0.001   |
|                            | Difficulty                    |                    |                  | 2.41 (1.86-3.11)   | <0.001   |
|                            | Need assistance               |                    |                  | 2.74 (2.22-3.38)   | <0.001   |
| <b>Disease</b>             |                               |                    | 1.30 (1.25-1.35) | <0.001             |          |

Notes: CI: Confidence Intervals. All analyses use weighted counts.
